# Supplementary material
Source: PubMed Central journal article supplement (PMC6504920)
Supplement: NIHMS1016027-supplement-1.pdf [file NIHMS1016027-supplement-1.pdf]

**Supplemental Table 1. SNP probe sequences for KASP™ genotyping assays.**

| SNP id     | Gene            | Minor allele | Probe sequence (forward strand)      |
|------------|-----------------|--------------|--------------------------------------|
| rs10761741 | <i>JMJD1C</i>   | T            | TTAGATTAATTTTTG[G/T]ATCCTATGGTCTCAT  |
| rs11144351 | <i>PIP5K1B</i>  | G            | CTAATTTTCATTATGT[A/G]TCTTTGCAAGATTTT |
| rs12359150 | <i>CUBN</i>     | A            | CAAATTCAACTCAC[C/A/G]AAAGGCCATCAAAAA |
| rs12566888 | <i>PEAR1</i>    | T            | AGCTTTGTACTCCAG[G/T]ATAGGAAGTGATGAG  |
| rs16876805 | <i>ATP6VOD2</i> | C            | TGAGGTTTCGGGATA[C/T]GGCCCTCTGGAGATT  |
| rs2363910  | <i>SHH</i>      | T            | TTTCCTATACCTGTT[G/T]ACCATGTGTATGTAT  |
| rs2479008  | <i>GMDS</i>     | T            | AAAAGATTCATTGAC[C/T]AGAGCTAATGAGCAA  |
| rs342286   | <i>PIK3CG</i>   | G            | ATCAACTGTGTTTca[A/G]taataatgggagagt  |
| rs4128880  | <i>RGS18</i>    | T            | ATACTTACTTAAAAG[C/T]ATTACTAAAATCACT  |
| rs467053   | <i>ADAMTS2</i>  | C            | GAGGACGGAGAGCTC[C/T]TGCTKTGAGCCGAGA  |
| rs7940646  | <i>MRVII</i>    | T            | GGATGCTGCACTGTC[C/T]GGGTGAGTCAGCTTC  |
| rs9996294  | <i>RAPGEF2</i>  | G            | GTCATATTTTTAGCC[A/G]CTAAAGCAGATATGG  |

**Supplemental Table 2: Sample size for each phenotype examined.**

|                                                  | <b>Phase 2</b> | <b>Phase 3</b> |
|--------------------------------------------------|----------------|----------------|
| <b>Platelet Aggregation Measures</b>             |                |                |
| 1° ADP PRP aggregation 0.725 uM/L                | 1197 (990)     | --             |
| 2° ADP PRP aggregation 0.725 uM/L <sup>a</sup>   | 1196 (990)     | --             |
| ADP Thrombin aggregation 0.056 units/mL          | 1196 (990)     | --             |
| Shear Stress (absolute PLT retention)            | --             | 1136 (986)     |
| Shear Stress (relative PLT retention)            | --             | 1136 (986)     |
| ADP WB impedance dose 1.5 Ω <sup>b</sup>         |                | 1187 (1025)    |
| ADP WB impedance dose 21.5 Ω <sup>b</sup>        |                | 1168 (1005)    |
| <b>Platelet Cell Count Measures</b>              |                |                |
| PLT                                              | 1250           | 1243           |
| MPV                                              | 1251           | 1236           |
| <b>Cell Count and Hemostatic Factor Measures</b> |                |                |
| Red Blood Cell Count                             | 1239           | 1241           |
| Hemoglobin                                       | 1239           | 1241           |
| Hematocrit                                       | 1238           | 1241           |
| MCH                                              | 1239           | 1241           |
| MCV                                              | 1239           | 1240           |
| White Blood Cell Count                           | 1239           | 1238           |
| Neutrophil count                                 | 1238           | 1240           |
| Lymphocyte count                                 | 1239           | 1227           |
| Monocyte count                                   | 1178           | 1239           |
| Eosinophil count <sup>a</sup>                    | 1194           | 1235           |
| Basophil count <sup>a</sup>                      | 1178           | 1239           |
| Leukocyte count                                  | 1194           | 1230           |
| D-dimer (ELISA)                                  | 1185           | --             |
| D-dimer (Gold)                                   | 1153           | --             |
| Fibrinogen (Clauss)                              | 896            | --             |
| PAI-1                                            | 993            | --             |
| tPA                                              | 1184           | --             |
| von Willebrand Factor                            | 1183           | --             |

<sup>a</sup>Log transformation; <sup>b</sup>Square root transformation; Numbers in parentheses indicate sample size following exclusions

Abbreviations: PLT, platelet count; MPV, mean platelet volume; WB, whole blood; PRP, platelet rich plasma; MCH, mean corpuscular hemoglobin; MCV, mean corpuscular; PAI-1, plasminogen activator inhibitor-1; tPA, tissue plasminogen activator

**Supplemental Table 3: Genetic association results under additive models for Primary ADP, Secondary ADP, and Thrombin for all 11 SNPs without sample exclusions.**

| Marker     | Gene           | Allele | 1° ADP PRP |                       | 2° ADP PRP |                       | Thrombin PRP |                       |
|------------|----------------|--------|------------|-----------------------|------------|-----------------------|--------------|-----------------------|
|            |                |        | Effect     | p-value               | Effect     | p-value               | Effect       | p-value               |
| rs10761741 | <i>JMJD1C</i>  | G      | -0.21      | 0.521                 | -0.023     | 0.0710                | -0.13        | 0.586                 |
| rs11144351 | <i>PIP5K1B</i> | G      | -0.43      | 0.353                 | -0.0088    | 0.641                 | -0.63        | 0.0651                |
| rs12359150 | <i>CUBN</i>    | A      | 1.10       | 0.0415                | 0.044      | 0.0450                | 0.47         | 0.239                 |
| rs12566888 | <i>PEAR1</i>   | T      | -2.29      | 9.98x10 <sup>-5</sup> | -0.13      | 1.51x10 <sup>-7</sup> | -2.07        | 1.91x10 <sup>-6</sup> |
| rs2363910  | <i>SHH</i>     | T      | -1.27      | 0.0161                | -0.058     | 6.65x10 <sup>-3</sup> | -0.044       | 0.910                 |
| rs2479008  | <i>GMDS</i>    | T      | -0.70      | 0.118                 | -0.013     | 0.471                 | 0.012        | 0.972                 |
| rs342286   | <i>PIK3CG</i>  | G      | 0.37       | 0.248                 | 0.00024    | 0.985                 | -0.32        | 0.180                 |
| rs4128880  | <i>RGS18</i>   | C      | -0.64      | 0.0410                | -0.036     | 4.35x10 <sup>-3</sup> | -0.31        | 0.179                 |
| rs467053   | <i>ADAMTS2</i> | C      | 0.27       | 0.388                 | 0.0069     | 0.593                 | 0.18         | 0.440                 |
| rs7940646  | <i>MRVII</i>   | C      | -0.58      | 0.0937                | -0.019     | 0.171                 | -0.37        | 0.145                 |
| rs9996294  | <i>RAPGEF2</i> | G      | 0.38       | 0.423                 | 0.027      | 0.166                 | 0.42         | 0.226                 |

Abbreviations: PRP, platelet-rich plasma

**Supplemental Table 4: Genetic association results under additive models for Primary ADP, Secondary ADP, and Thrombin for all 11 SNPs with sample exclusions.**

| Marker     | Gene           | Allele | 1° ADP PRP |                       | 2° ADP PRP |                       | Thrombin PRP |                       |
|------------|----------------|--------|------------|-----------------------|------------|-----------------------|--------------|-----------------------|
|            |                |        | Effect     | p-value               | Effect     | p-value               | Effect       | p-value               |
| rs10761741 | <i>JMJD1C</i>  | G      | -0.16      | 0.6378                | -0.022     | 0.1158                | 0.039        | 0.8817                |
| rs11144351 | <i>PIP5K1B</i> | G      | -0.36      | 0.482                 | -0.0069    | 0.7418                | -0.69        | 0.06999               |
| rs12359150 | <i>CUBN</i>    | A      | 1.58       | 6.79x10 <sup>-3</sup> | 0.046      | 0.05426               | 0.37         | 0.3938                |
| rs12566888 | <i>PEAR1</i>   | T      | -1.83      | 4.71x10 <sup>-3</sup> | -0.11      | 2.56x10 <sup>-5</sup> | -2.17        | 8.07x10 <sup>-6</sup> |
| rs2363910  | <i>SHH</i>     | T      | -0.50      | 0.3765                | -0.038     | 0.1107                | 0.22         | 0.6042                |
| rs2479008  | <i>GMDS</i>    | T      | -0.86      | 0.07935               | -0.013     | 0.5306                | -0.16        | 0.6678                |
| rs342286   | <i>PIK3CG</i>  | G      | 0.22       | 0.5319                | -0.014     | 0.3177                | -0.25        | 0.3381                |
| rs4128880  | <i>RGS18</i>   | C      | -0.57      | 0.09606               | -0.037     | 8.08x10 <sup>-3</sup> | -0.27        | 0.2991                |
| rs467053   | <i>ADAMTS2</i> | C      | 0.21       | 0.5366                | 0.0008     | 0.9569                | 0.072        | 0.7828                |
| rs7940646  | <i>MRVII</i>   | C      | -0.73      | 0.04895               | -0.026     | 0.09116               | -0.50        | 0.1569                |
| rs9996294  | <i>RAPGEF2</i> | G      | 0.25       | 0.6356                | 0.028      | 0.1945                | 0.42         | 0.2792                |

Abbreviations: PRP, platelet-rich plasma

**Supplemental Table 5: Genetic association results under additive models for Absolute and Relative Shear Stress for all 11 SNPs without sample exclusions.**

| Marker     | Gene           | Allele | Absolute Shear Stress |         | Relative Shear Stress |         |
|------------|----------------|--------|-----------------------|---------|-----------------------|---------|
|            |                |        | Effect                | p-value | Effect                | p-value |
| rs10761741 | <i>JMJD1C</i>  | G      | -3.28                 | 0.0420  | 0.0071                | 0.286   |
| rs11144351 | <i>PIP5K1B</i> | G      | 0.00056               | 0.999   | -0.0029               | 0.764   |
| rs12359150 | <i>CUBN</i>    | A      | 0.15                  | 0.956   | 0.021                 | 0.0515  |
| rs12566888 | <i>PEAR1</i>   | T      | 0.80                  | 0.785   | -0.022                | 0.0688  |
| rs2363910  | <i>SHH</i>     | T      | 0.20                  | 0.939   | -0.010                | 0.347   |
| rs2479008  | <i>GMDS</i>    | T      | -3.20                 | 0.152   | -0.011                | 0.236   |
| rs342286   | <i>PIK3CG</i>  | G      | -3.02                 | 0.0609  | -0.0077               | 0.252   |
| rs4128880  | <i>RGS18</i>   | C      | -0.98                 | 0.535   | 0.0017                | 0.799   |
| rs467053   | <i>ADAMTS2</i> | C      | -1.34                 | 0.401   | -0.0041               | 0.535   |
| rs7940646  | <i>MRVII</i>   | C      | 3.21                  | 0.0622  | 0.0076                | 0.284   |
| rs9996294  | <i>RAPGEF2</i> | G      | -1.69                 | 0.469   | -0.0068               | 0.489   |

**Supplemental Table 6: Genetic association results under additive models for Absolute and Relative Shear Stress for all 11 SNPs with sample exclusions.**

| Marker     | Gene           | Allele | Absolute Shear Stress |         | Relative Shear Stress |         |
|------------|----------------|--------|-----------------------|---------|-----------------------|---------|
|            |                |        | Effect                | p-value | Effect                | p-value |
| rs10761741 | <i>JMJD1C</i>  | G      | -2.86                 | 0.1047  | -0.010                | 0.1575  |
| rs11144351 | <i>PIP5K1B</i> | G      | 0.61                  | 0.8064  | 0.002                 | 0.8809  |
| rs12359150 | <i>CUBN</i>    | A      | 0.42                  | 0.8845  | 0.017                 | 0.1545  |
| rs12566888 | <i>PEAR1</i>   | T      | 0.18                  | 0.9548  | -0.031                | 0.0166  |
| rs2363910  | <i>SHH</i>     | T      | 1.62                  | 0.5784  | -0.002                | 0.8702  |
| rs2479008  | <i>GMDS</i>    | T      | -2.65                 | 0.2728  | -0.009                | 0.3774  |
| rs342286   | <i>PIK3CG</i>  | G      | -1.96                 | 0.2641  | -0.002                | 0.7663  |
| rs4128880  | <i>RGS18</i>   | C      | -1.12                 | 0.5119  | -0.0003               | 0.9663  |
| rs467053   | <i>ADAMTS2</i> | C      | -1.13                 | 0.5058  | -0.005                | 0.486   |
| rs7940646  | <i>MRVII</i>   | C      | 3.36                  | 0.0711  | 0.004                 | 0.6092  |
| rs9996294  | <i>RAPGEF2</i> | G      | -0.50                 | 0.8464  | -0.003                | 0.7712  |

**Supplemental Table 7: Genetic association results under additive models for ADP dose require for 1.5  $\Omega$  and 21.5  $\Omega$  impedance change for all 11 SNPs without sample exclusions.**

| Marker     | Gene           | Allele | ADP impedance 1.5 $\Omega$ |                       | ADP impedance 21.5 $\Omega$ |                       |
|------------|----------------|--------|----------------------------|-----------------------|-----------------------------|-----------------------|
|            |                |        | Effect                     | p-value               | Effect                      | p-value               |
| rs10761741 | <i>JMJD1C</i>  | G      | 0.44                       | 1.35x10 <sup>-3</sup> | 0.42                        | 8.52x10 <sup>-3</sup> |
| rs11144351 | <i>PIP5K1B</i> | G      | 0.24                       | 0.219                 | 0.43                        | 0.0612                |
| rs12359150 | <i>CUBN</i>    | A      | -0.34                      | 0.144                 | -0.33                       | 0.224                 |
| rs12566888 | <i>PEAR1</i>   | T      | 0.76                       | 2.36x10 <sup>-3</sup> | 0.60                        | 0.0380                |
| rs2363910  | <i>SHH</i>     | T      | -0.047                     | 0.834                 | -0.29                       | 0.260                 |
| rs2479008  | <i>GMDS</i>    | T      | 0.069                      | 0.720                 | 0.14                        | 0.543                 |
| rs342286   | <i>PIK3CG</i>  | G      | -0.31                      | 0.0223                | -0.31                       | 0.0545                |
| rs4128880  | <i>RGS18</i>   | C      | 0.17                       | 0.200                 | 0.27                        | 0.0928                |
| rs467053   | <i>ADAMTS2</i> | C      | 0.033                      | 0.808                 | 0.047                       | 0.773                 |
| rs7940646  | <i>MRVII</i>   | C      | 0.26                       | 0.0777                | 0.34                        | 0.0442                |
| rs9996294  | <i>RAPGEF2</i> | G      | -0.15                      | 0.459                 | -0.35                       | 0.141                 |

**Supplemental Table 8: Genetic association results under additive models for ADP dose require for 1.5  $\Omega$  and 21.5  $\Omega$  impedance change for all 11 SNPs with sample exclusions.**

| Marker     | Gene           | Allele | ADP impedance 1.5 $\Omega$ |                       | ADP impedance 21.5 $\Omega$ |         |
|------------|----------------|--------|----------------------------|-----------------------|-----------------------------|---------|
|            |                |        | Effect                     | p-value               | Effect                      | p-value |
| rs10761741 | <i>JMJD1C</i>  | G      | 0.46                       | 2.76x10 <sup>-3</sup> | 0.42                        | 0.01765 |
| rs11144351 | <i>PIP5K1B</i> | G      | 0.38                       | 0.07185               | 0.47                        | 0.06007 |
| rs12359150 | <i>CUBN</i>    | A      | -0.34                      | 0.1745                | -0.26                       | 0.3725  |
| rs12566888 | <i>PEAR1</i>   | T      | 0.81                       | 3.86x10 <sup>-3</sup> | 0.78                        | 0.0162  |
| rs2363910  | <i>SHH</i>     | T      | -0.13                      | 0.5914                | -0.27                       | 0.3468  |
| rs2479008  | <i>GMDS</i>    | T      | 0.084                      | 0.6907                | 0.11                        | 0.6432  |
| rs342286   | <i>PIK3CG</i>  | G      | -0.28                      | 0.06351               | -0.28                       | 0.1146  |
| rs4128880  | <i>RGS18</i>   | C      | 0.16                       | 0.2708                | 0.28                        | 0.0995  |
| rs467053   | <i>ADAMTS2</i> | C      | 0.032                      | 0.8298                | 0.024                       | 0.8911  |
| rs7940646  | <i>MRVII</i>   | C      | 0.24                       | 0.132                 | 0.32                        | 0.08638 |
| rs9996294  | <i>RAPGEF2</i> | G      | -0.24                      | 0.2952                | -0.56                       | 0.03336 |

**Supplemental Table 9: Demographics of CaPs subjects.**

| Phenotype                                        | Unit                | Phase 2        |       | Phase 3        |       |
|--------------------------------------------------|---------------------|----------------|-------|----------------|-------|
|                                                  |                     | Mean           | SD    | Mean           | SD    |
| Age                                              | years               | 56.68          | 4.44  | 61.89          | 5.07  |
| Smoking (current/former/never)                   | %                   | 41.9/38.7/19.4 |       | 34.9/47.4/17.7 |       |
| <b>Platelet Aggregation Measures</b>             |                     |                |       |                |       |
| 1° ADP PRP aggregation<br>0.725 uM/L             | %                   | 24.89          | 7.61  | -              | -     |
| 2° ADP PRP aggregation<br>0.725 uM/L*            | %                   | 22.91          | 18.54 | -              | -     |
| ADP Thrombin aggregation<br>0.056 units/mL       | %                   | 10.54          | 5.73  | -              | -     |
| Shear Stress<br>(absolute PLT retention)         | 10 <sup>9</sup> /L  | -              | -     | 125.69         | 37.37 |
| Shear Stress<br>(relative PLT retention)         | %                   | -              | -     | 64.66          | 15.50 |
| ADP WB impedance dose<br>1.5 Ω†                  | μM/L                | -              | -     | 1.15           | 0.82  |
| ADP WB impedance dose<br>21.5 Ω†                 | μM/L                | -              | -     | 1.53           | 1.02  |
| <b>Platelet Cell Count Measures</b>              |                     |                |       |                |       |
| PLT                                              | 10 <sup>9</sup> /L  | 263.17         | 57.80 | 235.39         | 54.37 |
| MPV                                              | fL x 10             | 88.54          | 10.26 | 78.18          | 9.175 |
| <b>Cell Count and Hemostatic Factor Measures</b> |                     |                |       |                |       |
| Red Blood Cell Count                             | 10 <sup>12</sup> /L | 5.12           | 0.38  | 4.95           | 0.39  |
| Hemoglobin                                       | g/L                 | 157.15         | 11.73 | 150.62         | 11.07 |
| Hematocrit                                       | %                   | 46.42          | 3.43  | 45.71          | 3.31  |
| MCH                                              | pG                  | 30.75          | 1.85  | 30.50          | 1.85  |
| MCV                                              | fL                  | 90.75          | 4.28  | 92.53          | 5.05  |
| White Blood Cell Count                           | 10 <sup>9</sup> /L  | 7.56           | 1.98  | 6.49           | 1.68  |
| Neutrophil count                                 | 10 <sup>9</sup> /L  | 5.59           | 0.73  | 5.57           | 0.82  |
| Lymphocyte count                                 | 10 <sup>9</sup> /L  | 3.33           | 0.66  | 3.06           | 0.71  |
| Monocyte count                                   | 10 <sup>9</sup> /L  | 0.59           | 0.16  | 0.74           | 0.18  |
| Eosinophil count*                                | 10 <sup>9</sup> /L  | 0.32           | 0.17  | 0.32           | 0.20  |
| Basophil count*                                  | 10 <sup>9</sup> /L  | 0.08           | 0.04  | 0.09           | 0.06  |
| Leukocyte count                                  | 10 <sup>9</sup> /L  | 0.10           | 0.06  | 0.21           | 0.10  |
| D-dimer (ELISA)                                  | ng/mL               | 82.86          | 69.46 | -              | -     |
| D-dimer (Gold)                                   | ng/mL               | 19.24          | 41.68 | -              | -     |
| Fibrinogen (Clauss)                              | g/L                 | 3.04           | 0.79  | -              | -     |
| PAI-1 (% pool)                                   | %                   | 13.85          | 5.68  | -              | -     |
| tPA                                              | ng/mL               | 11.59          | 4.08  | -              | -     |
| von Willebrand Factor                            | IU/dL               | 118.31         | 41.59 | -              | -     |

\*Log transformation; †Square root transformation

Abbreviations: PLT, platelet count; MPV, mean platelet volume; WB, whole blood; PRP, platelet rich plasma; MCH, mean corpuscular hemoglobin; MCV, mean corpuscular; PAI-1, plasminogen activator inhibitor-1; tPA, tissue plasminogen activator

**Supplemental Table 10: Strongest genetic association result for each marker examined.**

| <b>Marker</b> | <b>Gene</b>    | <b>Allele</b> | <b>Phenotype</b>               | <b>Model</b> | <b>Effect</b> | <b>p-value</b>        |
|---------------|----------------|---------------|--------------------------------|--------------|---------------|-----------------------|
| rs10761741    | <i>JMJD1C</i>  | G             | ADP impedance<br>1.5 $\Omega$  | Recessive    | 0.66          | 6.54x10 <sup>-4</sup> |
| rs11144351    | <i>PIP5K1B</i> | G             | Absolute Shear<br>Stress       | Recessive    | 20.12         | 0.0279                |
| rs12359150    | <i>CUBN</i>    | A             | 2° ADP PRP<br>aggregation      | Dominant     | 0.048         | 0.0399                |
| rs12566888    | <i>PEAR1</i>   | T             | 2° ADP PRP<br>aggregation      | Additive     | -0.13         | 1.51x10 <sup>-7</sup> |
| rs2363910     | <i>SHH</i>     | T             | 2° ADP PRP<br>aggregation      | Additive     | -0.058        | 6.65x10 <sup>-3</sup> |
| rs2479008     | <i>GMDS</i>    | T             | Relative Shear<br>Stress       | Recessive    | -0.064        | 0.0330                |
| rs342286      | <i>PIK3CG</i>  | G             | ADP impedance<br>1.5 $\Omega$  | Additive     | -0.31         | 0.0223                |
| rs4128880     | <i>RGS18</i>   | C             | 2° ADP PRP<br>aggregation      | Recessive    | -0.060        | 2.90x10 <sup>-3</sup> |
| rs467053      | <i>ADAMTS2</i> | C             | Absolute Shear<br>Stress       | Dominant     | -1.95         | 0.405                 |
| rs7940646     | <i>MRVII</i>   | C             | Absolute Shear<br>Stress       | Dominant     | 11.01         | 5.04x10 <sup>-3</sup> |
| rs9996294     | <i>RAPGEF2</i> | G             | ADP impedance<br>21.5 $\Omega$ | Dominant     | -0.43         | 0.100                 |
